# Supplementary material for: Vertically ordered SnO2 nanobamboos for substantially improved detection of volatile reducing gases
Source: Royal Society of Chemistry journal article supplement (doi:10.1039/c5ta03293h), 2015-01-01
Supplement: c5ta03293h1.pdf [file c5ta03293h1.pdf]

## Electronic Supporting Information

### Vertically ordered SnO<sub>2</sub> nanobamboos for substantially improved detection of volatile reducing gases†

*Jong-Myeong Jeon,<sup>a,‡</sup> Young-Seok Shim,<sup>a,‡</sup> Su Deok Han,<sup>b</sup> Do Hong Kim,<sup>a</sup> Yeon Hoo Kim,<sup>a</sup>*

*Chong-Yun Kang,<sup>b</sup> Jin-Sang Kim,<sup>b</sup> Miyoung Kim,<sup>a</sup> and Ho Won Jang,<sup>a,\*</sup>*

<sup>a</sup> *Department of Materials Science and Engineering, Research Institute of Advanced Materials,  
Seoul National University, Seoul 151-744, Korea.*

<sup>b</sup> *Electronic materials research center, Korea Institute of Science and Technology, Seoul 136-  
791, Korea*

† These authors contributed equally to this work

Corresponding author: hwjang@snu.ac.kr

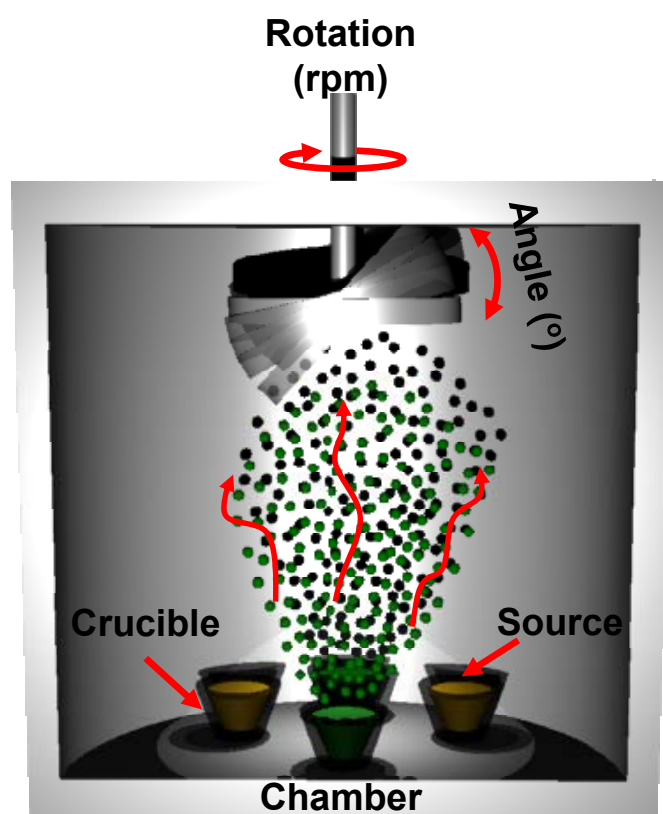

**Figure S1.** Schematic diagram of the GLAD setup using e-beam evaporator.

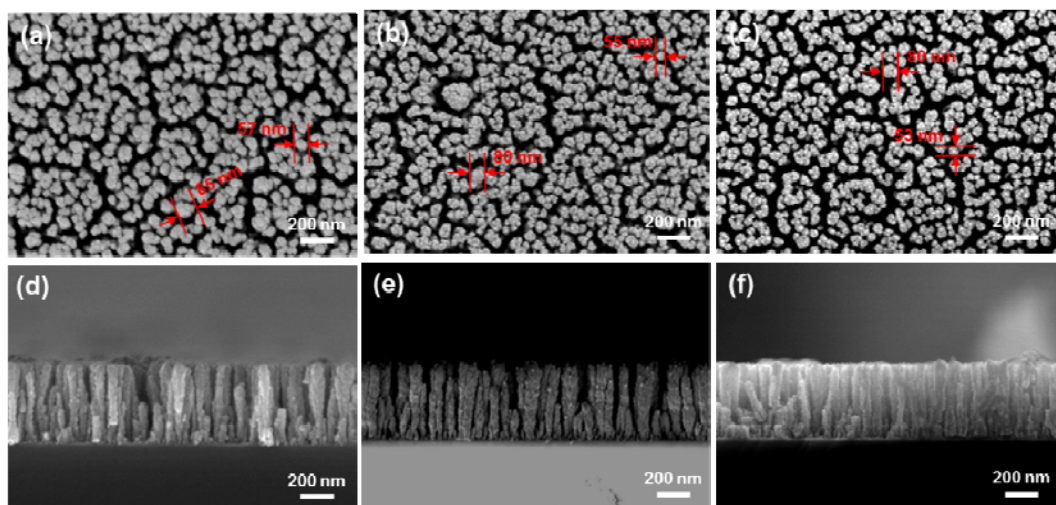

**Figure S2.** Plain-view SEM micrographs of the (a) bare, (b) top-surface Au-decorated SnO<sub>2</sub> nanorods, and (c) the SnO<sub>2</sub> nanobamboos. Cross-sectional SEM micrographs of the (d) bare, (e) top-surface Au-decorated SnO<sub>2</sub> nanorods, and (f) the SnO<sub>2</sub> nanobamboos.

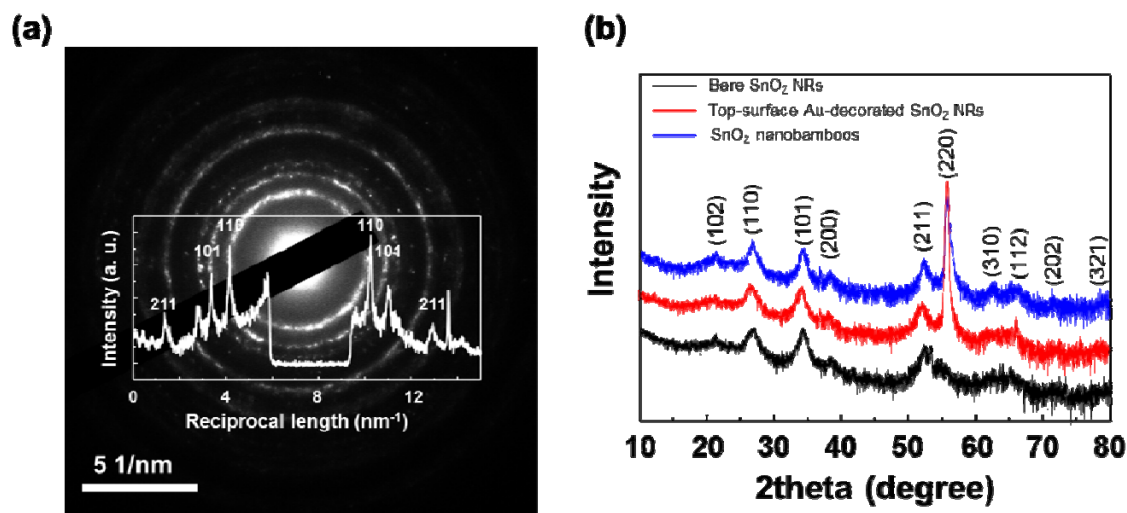

**Figure S3.** (a) Diffraction patterns of the vertically ordered SnO<sub>2</sub> nanorods. (b) Glancing angle X-ray diffraction patterns of the bare SnO<sub>2</sub> nanorods (NRs), of the top-surface Au-decorated SnO<sub>2</sub> NRs, and of the SnO<sub>2</sub> nanobamboos annealed at 550 °C for 1 h.

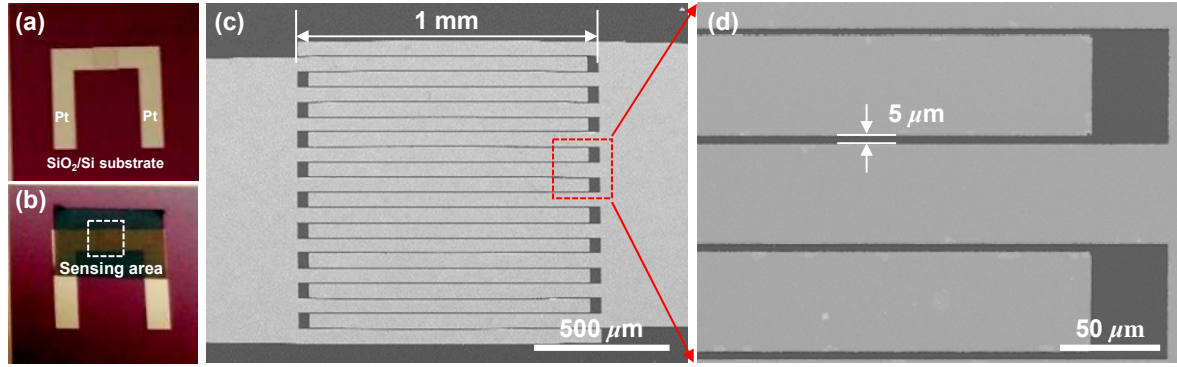

**Figure S4.** Photographs of the sensing device (a) before and (b) after deposition of the SnO<sub>2</sub> nanobamboos. Plain-view SEM micrographs of the (c) Pt IDEs patterned substrate and (d) high magnification SEM image of selected area in (c).

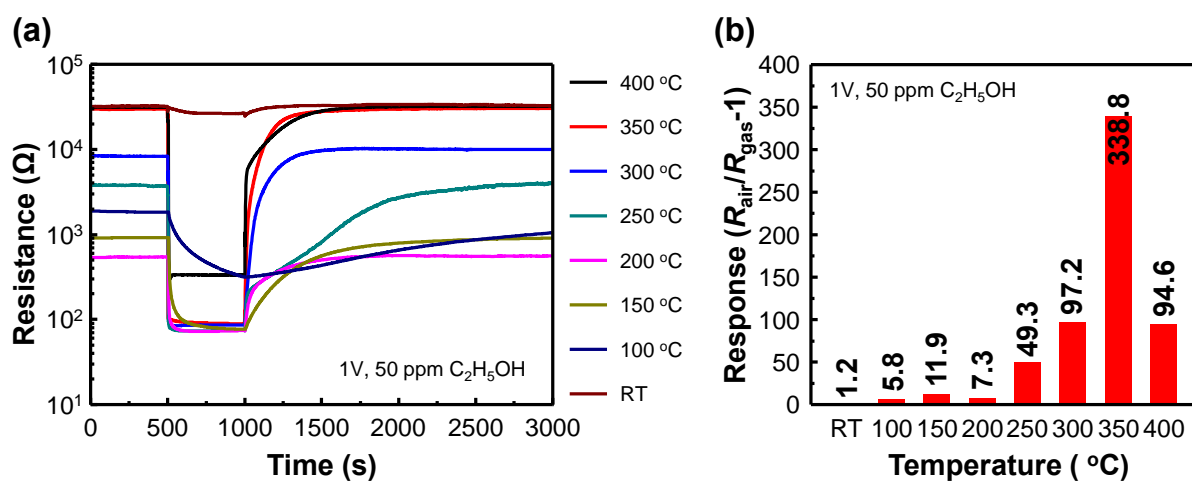

**Figure S5.** (a) The response curves and (b) responses of the SnO<sub>2</sub> nanobamboos to 50 ppm C<sub>2</sub>H<sub>5</sub>OH as a function of temperature.

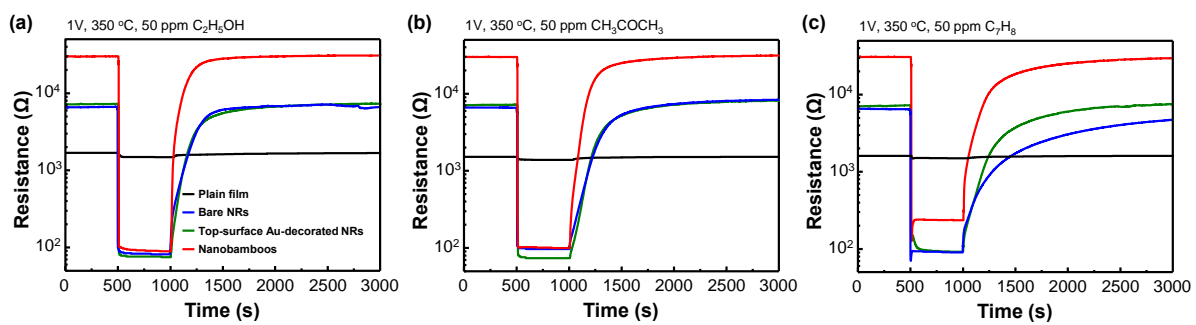

**Figure S6.** The response curves of the plain  $SnO_2$  film, bare  $SnO_2$  nanorods (NRs), top-surface Au-decorated  $SnO_2$  NRs, and the  $SnO_2$  nanobamboos to (a) 50 ppm  $C_2H_5OH$ , (b)  $CH_3COCH_3$ , and (c)  $C_7H_8$ .

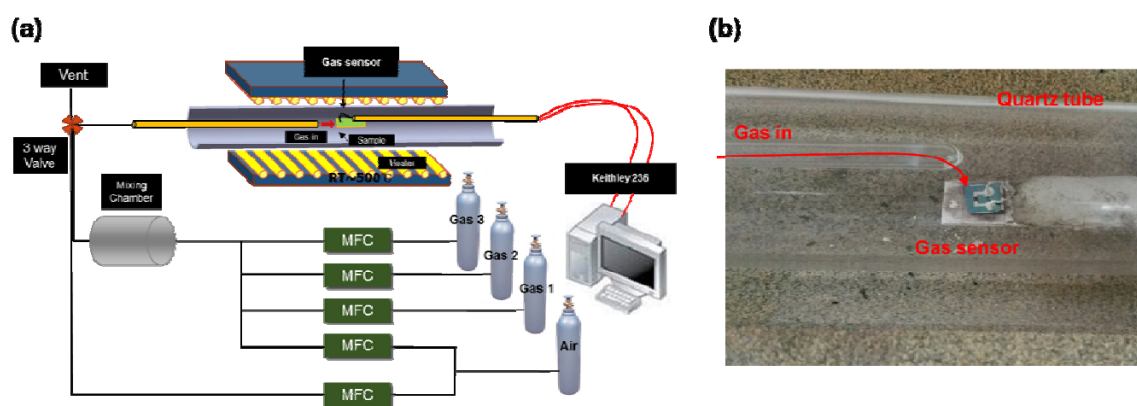

**Figure S7.** (a) Schematics of sensing measurement system and (b) photograph of gas injection in quartz tube
